# Supplementary material for: The FARSEEING real-world fall repository: a large-scale collaborative database to collect and share sensor signals from real-world falls
Source: Springer Nature journal article supplement (doi:10.1186/s11556-016-0168-9), 2016-10-29

## Fall example

Setting: Ataxia

Signal file: F\_93807530-06-2014-02-19-09-05-49.mat

### Personal characteristics

Gender: female      Age: 57 yrs      Height: 167 cm      Weight: 70 kg

### Sensor characteristics

Device: Samsung Galaxy S3      Location: L5

Sensor type(s): acc, gyro, mag      Unit(s): m/s<sup>2</sup>, °/s, µT

Sample rate: 100 Hz

### Fall report

Fall time reported: 19.02.2014 09:15:00

Fall time signal: 19.02.2014 09:05:49

When washing the hair, towel slipped over the forehead and covered the eyes. Due to loss of vision, subject fell backwards.

Witnessed: No

Assistive device: No

Reported pre-fall activity: standing/grasping

Reported fall direction: backwards

Indoor/outdoor: Indoor

Place of fall: -

Multiple impact: unknown

Fall on: bathtub

Got up without help: Yes

Injury: Yes

Injury classification: B

Injury location: head  
head

Injury description: laceration at the back of the

Adopted measures: no medical contact

# Fall example

Time window: 60 s

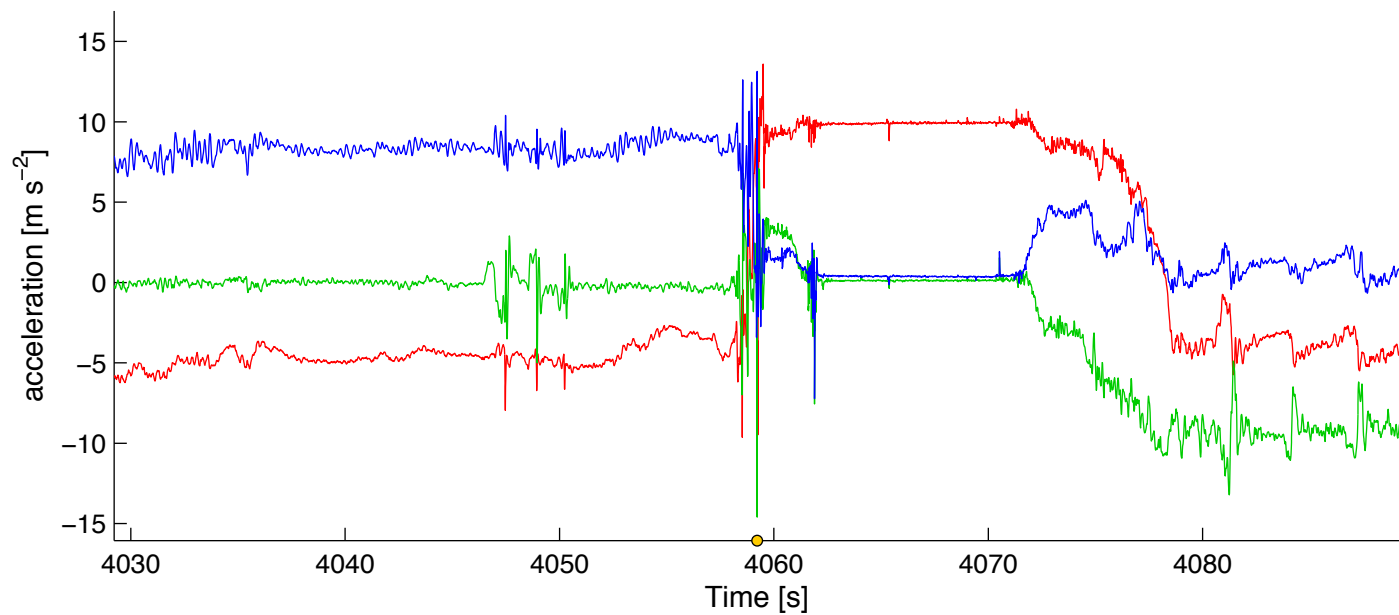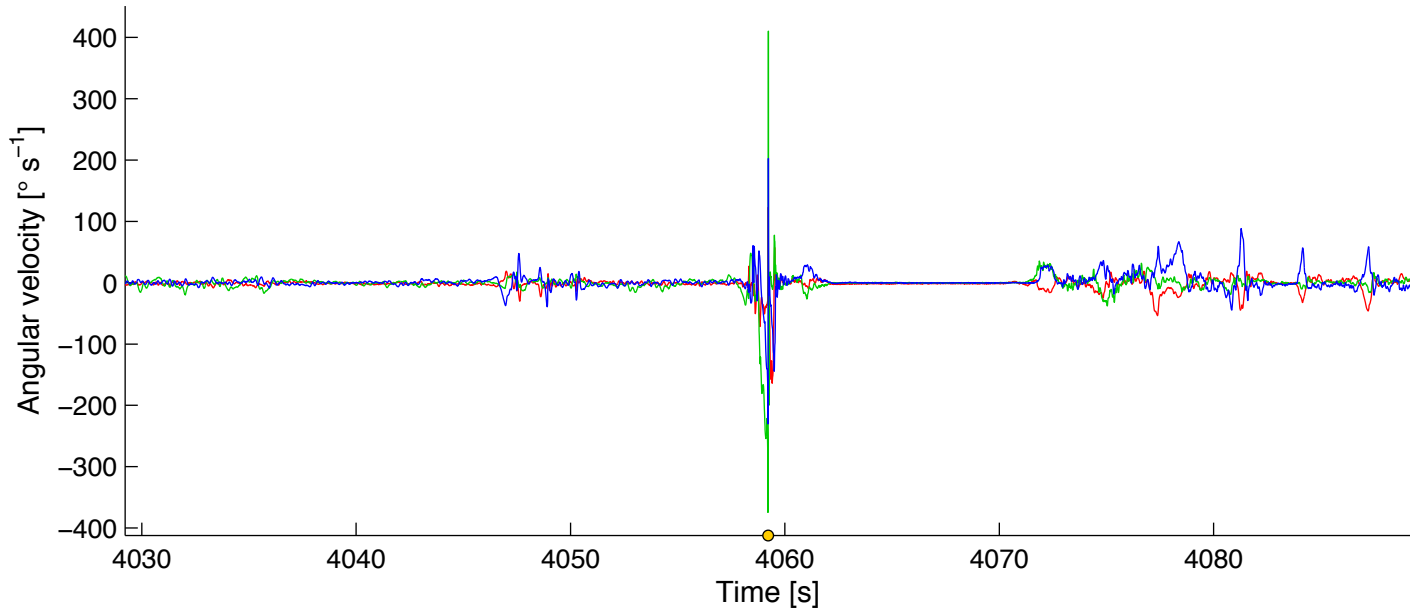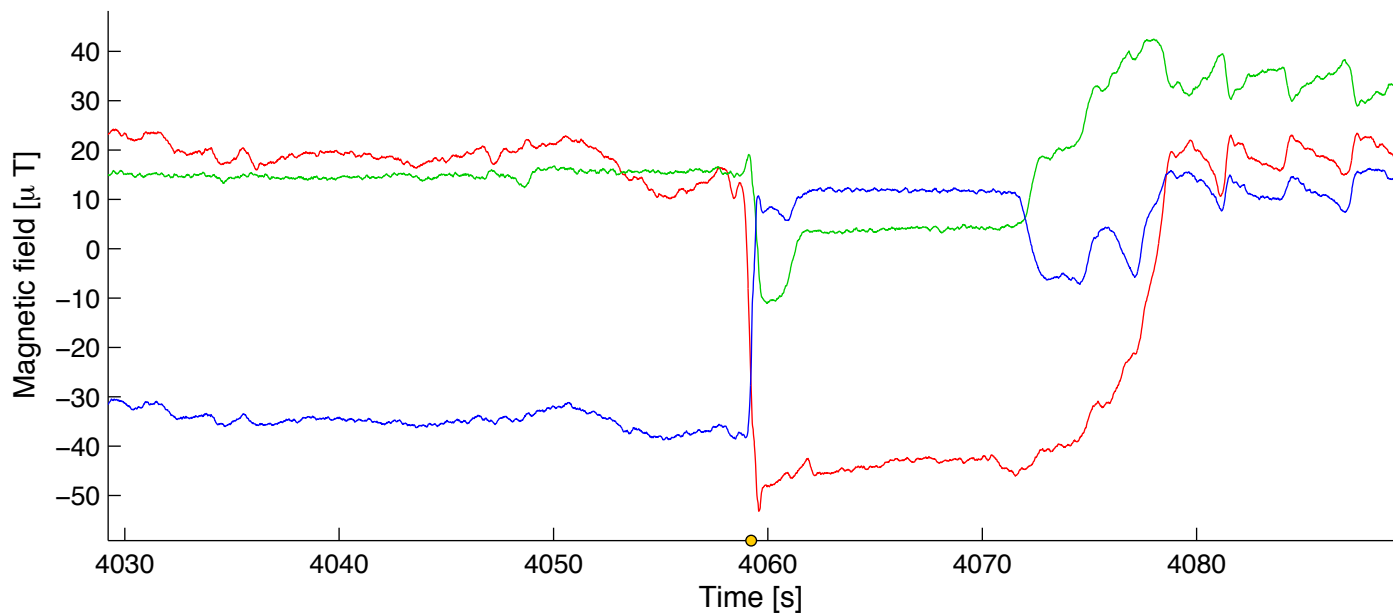

Supplement: MOESM2 [file 11556_2016_168_MOESM2_ESM.pdf]
